# Supplementary material
Source: ML conference proceedings conference paper supplement (https://proceedings.mlr.press/v139/hong21b.html)
Supplement: Supplementary file 2 [file hong21b-supp.zip]

Archive with 2 entries (2 files):
- Chebyshev_codes___Appendix.pdf
- cheby_poly-submit.zip
